# Supplementary material
Source: HighWire-hosted journal article supplement (https://hw-f5-jim.highwire.org/content/jim-2021-001927)
Supplement: inline-supplementary-material-1 [file inline-supplementary-material-1.pdf]

## Supplementary materials

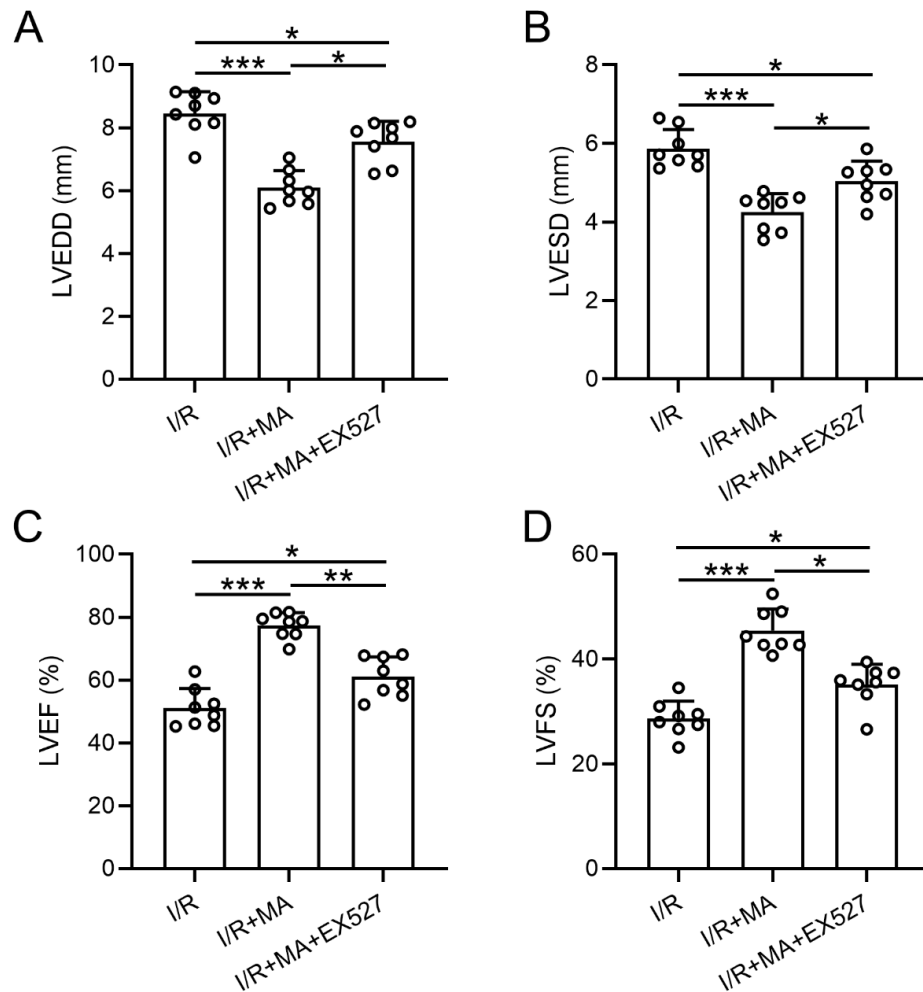

**Figure S1. EX527, a selective SIRT1 inhibitor, partly eliminated the effects of maslinic acid.** Cardiac performance-related parameters including LVEDD (A), LVESD (B), LVEF (C), and LVFS (D) were determined using echocardiography. The data were expressed as means  $\pm$  SD.  $N = 8$  for each group. \*  $P < 0.05$ , \*\*  $P < 0.01$ , and \*\*\*  $P < 0.001$  indicate significant difference.

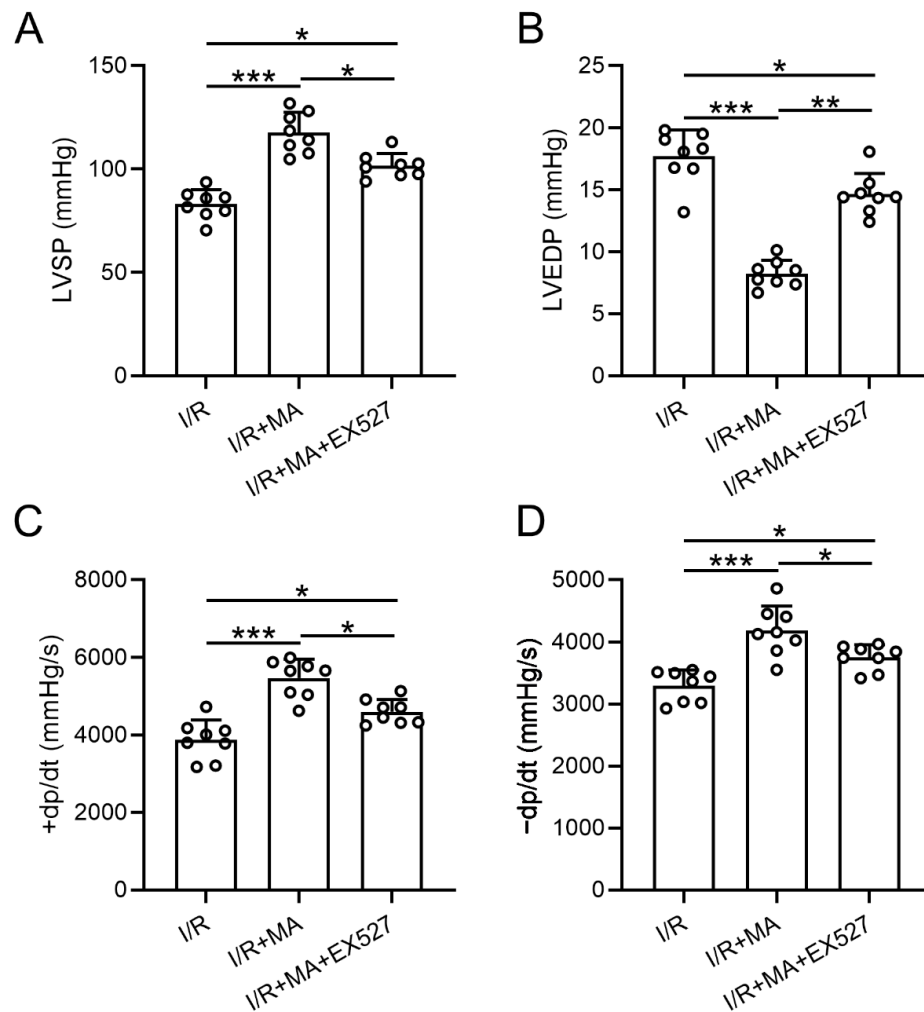

**Figure S2. EX527, a selective SIRT1 inhibitor, partly eliminated the effects of maslinic acid.** Left ventricle hemodynamic parameters including LVSP (A), LVEDP (B), +dp/dt (C), and -dp/dt (D) from left ventricle were determined using hemodynamic measurement. The data were expressed as means  $\pm$  SD. N = 8 for each group. \*  $P < 0.05$ , \*\*  $P < 0.01$ , and \*\*\*  $P < 0.001$  indicate significant difference.

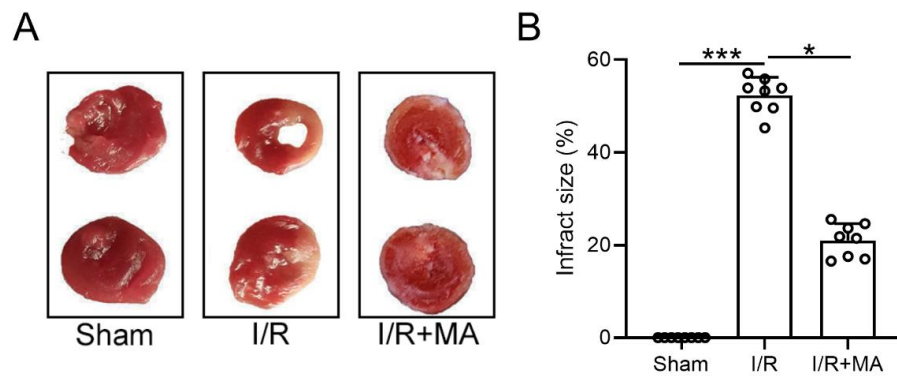

**Figure S3. Treatment of maslinic acid (20 mg/kg) attenuated infarct size in the rat model of ischemia-reperfusion injury.** The representative images of TTC staining. (B) the TTC statistics graph was displayed. The data were expressed as means  $\pm$  SD. N = 8 for each group. \*  $P < 0.05$  and \*\*\*  $P < 0.001$  indicate significant difference.
